# Supplementary material for: Gold-catalyzed cyclo-isomerization of 1,6-diyne-4-en-3-ols to form naphthyl ketone derivatives
Source: Royal Society of Chemistry journal article supplement (doi:10.1039/b618291g), 2007-01-01
Supplement: b618291g.pdf [file b618291g.pdf]

## *Supporting Information*

### **Gold-catalyzed Cycloisomerization of 1,6-Diyne-4-en-3-ols to form Naphthyl Ketone Derivatives.**

Jian-Jou Lian and Rai-Shung Liu\*

Department of Chemistry, National Tsing-Hua University, Hsinchu, Taiwan, ROC  
e-mail: [rsliu@mx.nthu.edu.tw](mailto:rsliu@mx.nthu.edu.tw)

#### Contents:

|                                                              |     |
|--------------------------------------------------------------|-----|
| (I) Experimental procedures for synthesis of substrates..... | S2  |
| (II) Standard procedures for catalytic operations.....       | S4  |
| (III) Spectral Data for Compounds <b>1-32</b> .....          | S4  |
| (IV) x-Ray data of the [3+2]-cycloadduct <b>2</b> .....      | S16 |

## (I) Experimental procedures for synthesis of the substrates

### (1) Synthesis of 3-phenyl-1-(2-(phenylethynyl)phenyl)prop-2-yn-1-ol (1).

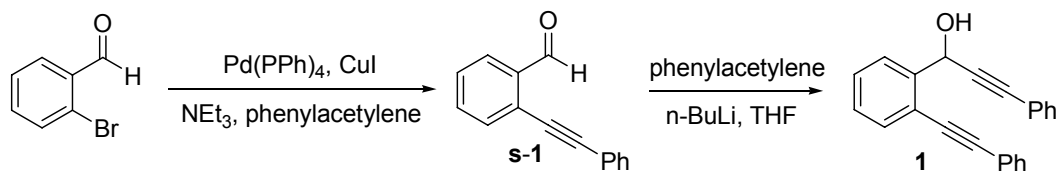

### (a) Synthesis of 2-(phenylethynyl)benzaldehyde (s-1).

To a triethylamine solution (10 ml) of 2-bromobenzaldehyde (1.0 g, 5.44 mmol) was added  $\text{Pd(PPh}_3)_4$  (313.9 mg, 0.3 mmol) and  $\text{CuI}$  (51.8 mg, 0.3 mmol) at 28 °C, and the mixture was stirred for 5 min before addition of phenylacetylene (582.5 mg, 5.71 mmol). The resulting mixture was stirred for 12 h, and the solvent was removed in vacuo, and added with a saturated  $\text{NaHCO}_3$  solution. The organic layer was extracted with ethyl acetate, washed with a saturated  $\text{NaCl}$  solution and dried over anhydrous  $\text{MgSO}_4$ . The residues were chromatographed through a silica gel column (hexane: ethyl acetate/9:1,  $R_f = 0.8$ ) to afford compound **s-1** (1.03 g, 5.0 mmol, 92%) as yellow oil.

### (b) Synthesis of 3-phenyl-1-(2-(phenylethynyl)phenyl)prop-2-yn-1-ol (1).

To a THF solution (10.0 mL) of phenylacetylene (544.7 mg, 5.34 mmol) was added  $n\text{-BuLi}$  (5.34 mmol) at  $-78$  °C, and the mixture was stirred for 20 min before addition of compound **s-1** (1.0 g, 4.85 mmol). The resulting solution was warmed to 28 °C and kept on stirring for 2 h before addition a saturated ammonium chloride solution. The organic layer was extracted with ethyl acetate, washed with water, dried over  $\text{MgSO}_4$ , and concentrated in vacuo. The residues were chromatographed on a silica column (hexane: ethyl acetate/1:1,  $R_f = 0.5$ ) to afford compound **1** (1.29 g, 4.17 mmol, 86%) as colorless oil.

### (2) Synthesis of 3-(4-methoxyphenyl)-1-(2-(phenylethynyl)phenyl) prop-2-

**yn-1-ol (5).**

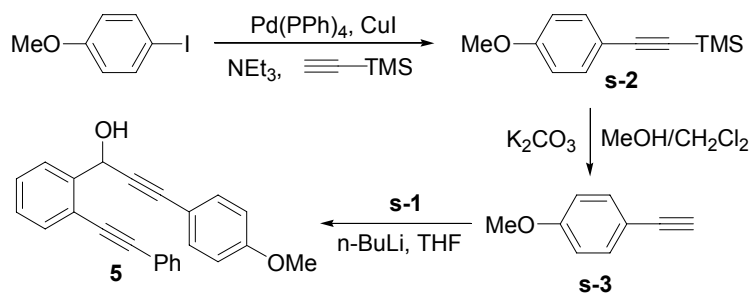

**(a) Synthesis of 1-ethynyl-4-methoxybenzene (s-3).**

To a triethylamine solution (10 ml) of 1-iodo-4-methoxybenzene (3.0 g, 12.8 mmol) was added  $\text{Pd(PPh}_3)_4$  (740.5 mg, 06 mmol) and  $\text{CuI}$  (122.1 mg, 0.6 mmol) at  $28\text{ }^\circ\text{C}$ , and the mixture was stirred for 5 min before addition of ethynyltrimethylsilane (1.38 g, 14.1 mmol). The resulting mixture was stirred for 12 h, and the solvent was removed in vacuo, and added with a saturated  $\text{NaHCO}_3$  solution. The organic layer was extracted with ethyl acetate, washed with a saturated  $\text{NaCl}$  solution and dried over anhydrous  $\text{MgSO}_4$ . The residues were chromatographed through a silica gel column (hexane: ethyl acetate/9:1,  $R_f = 0.6$ ) to afford compound s-2 (2.12 g, 10.4 mmol, 81%) as yellow oil. To a  $\text{MeOH/CH}_2\text{Cl}_2$  mixture solution (20.0 mL) of compound s-2 (2.12 g, 10.4 mmol) was added moderate  $\text{K}_2\text{CO}_3$  at  $25\text{ }^\circ\text{C}$ . The resulting mixture was stirred for 30 min, and the solvent was removed in vacuo, and added with a saturated  $\text{NH}_4\text{Cl}$  solution. The organic layer was extracted with ethyl acetate, washed with water, dried over  $\text{MgSO}_4$ , and concentrated in vacuo. The residues were chromatographed on a silica column (hexane: ethyl acetate/1:9,  $R_f = 0.5$ ) to afford compound s-3 (1.30 g, 9.87 mmol, 95%) as colorless oil.

**(b) Synthesis of 3-(4-methoxyphenyl)-1-(2-(phenylethynyl)phenyl)prop-2-yn-1-ol (5).**

To a THF solution (10.0 mL) of compound s-3 (704.9 mg, 5.34 mmol) was added  $n\text{-BuLi}$  (5.34 mmol) at  $-78\text{ }^\circ\text{C}$ , and the mixture was stirred for 20 min before addition

of compound **s-1** (1.0 g, 4.85 mmol). The resulting solution was warmed to 28 °C and kept on stirring for 2 h before addition a saturated ammonium chloride solution. The organic layer was extracted with ethyl acetate, washed with water, dried over MgSO<sub>4</sub>, and concentrated in vacuo. The residues were chromatographed on a silica column (hexane: ethyl acetate/1:1, R<sub>f</sub> = 0.4) to afford compound **5** (1.25 g, 3.69 mmol, 76%) as colorless oil.

## (II) A typical procedure for catalytic cyclization of 1,6-Diyne-4-en-3-ol.

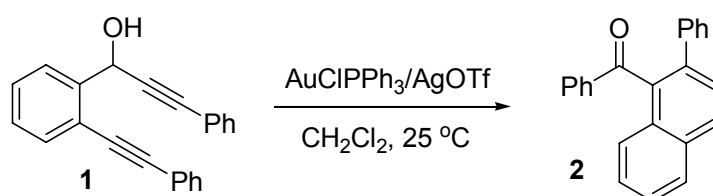

### (a) Synthesis of phenyl(2-phenylnaphthalen-1-yl)methanone (**2**).

A solution of PPh<sub>3</sub>AuOTf (2 mol%) was prepared by mixing PPh<sub>3</sub>AuCl (3.2 mg, 0.006 mmol) and AgOTf (1.7 mg, 0.006 mmol) in dichloromethane (1.0 mL). To this solution was added compound **1** (100 mg, 0.32 mmol) at 25 °C, the mixture was stirred for 3 h. The resulting solution was filtered through a celite bed, and eluted through a silica gel column (ethyl acetate/hexane = 1/15) to give compound **2** (85.0 mg, 0.28 mmol, 85%) as yellow solid.

## (III) Spectral Data for Compounds 1-32

### Spectra data for 3-phenyl-1-(2-(phenylethynyl)phenyl)prop-2-yn-1-ol (**1**).

Yellow oil; IR (neat, cm<sup>-1</sup>): 3550(s), 2920(s); <sup>1</sup>H NMR (500 MHz, CDCl<sub>3</sub>): δ 7.80 (d, *J* = 8.0 Hz, 1H), 7.59~7.57 (m, 3H), 7.46 (d, *J* = 8.0 Hz, 2H), 7.40 (t, *J* = 8.0 Hz, 1H), 7.36~7.32 (m, 4H), 7.31~7.26 (m, 3H), 6.18 (s, 1H); <sup>13</sup>C NMR (125 MHz, CDCl<sub>3</sub>): δ 142.2, 132.4, 131.7 (2×CH), 131.5 (2×CH), 128.9, 128.6, 128.4, 128.3, 128.2

(2×CH), 128.1 (2×CH), 126.7, 122.7, 122.4, 121.4, 95.0, 88.3, 86.6, 86.4, 63.7;

HRMS calcd for C<sub>23</sub>H<sub>16</sub>O: 308.1201, found: 308.1200.

**Spectra data for phenyl(2-phenylnaphthalen-1-yl)methanone (2).**

Yellow solid, m.p. 121.0~121.6 °C; IR (neat, cm<sup>-1</sup>): 3085(s), 1660(s); <sup>1</sup>H NMR (500 MHz, CDCl<sub>3</sub>): δ 8.01 (d, *J* = 8.0 Hz, 1H), 7.93 (d, *J* = 8.0 Hz, 1H), 7.73 (d, *J* = 8.0 Hz, 1H), 7.62 (d, *J* = 8.0 Hz, 2H), 7.57 (d, *J* = 8.0 Hz, 1H), 7.51 (t, *J* = 8.0 Hz, 1H), 7.45 (t, *J* = 8.0 Hz, 1H), 7.39~7.34 (m, 3H), 7.24~7.20 (m, 4H), 7.16 (t, *J* = 8.0 Hz, 1H); <sup>13</sup>C NMR (125 MHz, CDCl<sub>3</sub>): δ 199.7, 140.1, 137.8, 137.4, 135.6, 133.2, 132.4, 130.6, 129.5 (2×CH), 129.4 (3×CH), 128.2 (2×CH), 128.1 (3×CH), 127.5, 127.4, 127.2, 126.3, 125.5; HRMS calcd for C<sub>23</sub>H<sub>16</sub>O: 308.1201, found: 308.1200.

**Spectra data for 1-(2-(phenylethynyl)phenyl)-3-*p*-tolylprop-2-yn-1-ol (3).**

Yellow oil; IR (neat, cm<sup>-1</sup>): 3552(s), 2930(s); <sup>1</sup>H NMR (500 MHz, CDCl<sub>3</sub>): δ 7.77 (d, *J* = 8.0 Hz, 1H), 7.59~7.53 (m, 3H), 7.39 (t, *J* = 8.0 Hz, 1H), 7.35~7.31 (m, 6H), 7.08 (d, *J* = 8.0 Hz, 2H), 6.13 (s, 1H), 2.32 (s, 3H); <sup>13</sup>C NMR (125 MHz, CDCl<sub>3</sub>): δ 142.3, 138.6, 132.4, 131.6 (2×CH), 131.5 (2×CH), 129.0 (2×CH), 128.9, 128.6, 128.4 (2×CH), 128.2, 126.8, 122.8, 121.4, 119.4, 95.0, 87.6, 88.6 (2×C), 63.7, 21.4; HRMS calcd for C<sub>24</sub>H<sub>18</sub>O: 322.1358, found: 322.1355.

**Spectra data for 3-(4-fluorophenyl)-1-(2-(phenylethynyl)phenyl)prop-2-yn-1-ol (4).**

Yellow oil; IR (neat, cm<sup>-1</sup>): 3553(s), 2923(s); <sup>1</sup>H NMR (500 MHz, CDCl<sub>3</sub>): δ 7.50 (d, *J* = 7.5 Hz, 1H), 7.58~7.53 (m, 3H), 7.42~7.38 (m, 3H), 7.35~7.32 (m, 4H), 6.96 (t, *J* = 9.0 Hz, 2H), 6.12 (s, 1H); <sup>13</sup>C NMR (125 MHz, CDCl<sub>3</sub>): δ 162.4 (d, *J*<sub>CF</sub> = 249.1 Hz), 142.1, 133.5 (d, *J*<sub>CF</sub> = 7.8 Hz, 2×CH), 132.4, 131.4 (2×CH), 128.8, 128.5, 128.3 (2×CH), 128.2, 126.5, 122.7, 121.2, 118.5, 115.3 (d, *J*<sub>CF</sub> = 22.1 Hz, 2×CH), 95.0, 88.1, 86.6, 85.2, 63.5; HRMS calcd for C<sub>23</sub>H<sub>15</sub>FO: 326.1107, found: 326.1107.

**Spectra data for 3-(4-methoxyphenyl)-1-(2-(phenylethynyl)phenyl)prop-2-yn-1-ol**

**(5).**

Yellow oil; IR (neat,  $\text{cm}^{-1}$ ): 3552(s), 2922(s);  $^1\text{H}$  NMR (500 MHz,  $\text{CDCl}_3$ ):  $\delta$  7.78 (d,  $J = 8.0$  Hz, 1H), 7.57~7.55 (m, 3H), 7.40~7.37 (m, 3H), 7.35~7.30 (m, 4H), 6.79 (d,  $J = 8.0$  Hz, 2H), 6.14 (s, 1H), 3.77 (s, 3H);  $^{13}\text{C}$  NMR (125 MHz,  $\text{CDCl}_3$ ):  $\delta$  159.7, 142.5, 133.2 (2 $\times$ CH), 132.4, 131.5 (2 $\times$ CH), 128.9, 128.6, 128.4 (2 $\times$ CH), 128.2, 126.7, 122.8, 121.4, 114.6, 113.8 (2 $\times$ CH), 94.9, 86.9, 88.6, 86.4, 63.7, 55.2; HRMS calcd for  $\text{C}_{24}\text{H}_{18}\text{O}_2$ : 338.1307, found: 338.1306.

**Spectra data for 1-(2-(phenylethynyl)phenyl)but-2-yn-1-ol (6).**

Yellow oil; IR (neat,  $\text{cm}^{-1}$ ): 3555(s), 2925(s);  $^1\text{H}$  NMR (500 MHz,  $\text{CDCl}_3$ ):  $\delta$  7.72 (d,  $J = 7.5$  Hz, 1H), 7.55~7.53 (m, 3H), 7.38~7.34 (m, 4H), 7.29 (t,  $J = 7.5$  Hz, 1H), 5.93 (s, 1H), 1.88 (s, 3H);  $^{13}\text{C}$  NMR (125 MHz,  $\text{CDCl}_3$ ):  $\delta$  142.8, 132.3, 131.5 (2 $\times$ CH), 128.8, 128.5, 128.3 (2 $\times$ CH), 128.0, 126.5, 122.8, 121.2, 94.7, 86.6, 82.9, 78.6, 63.2, 3.7; HRMS calcd for  $\text{C}_{18}\text{H}_{14}\text{O}$ : 246.1405, found: 246.1406.

**Spectra data for 1-(2-(phenylethynyl)phenyl)hept-2-yn-1-ol (7).**

Yellow oil; IR (neat,  $\text{cm}^{-1}$ ): 3560(s), 2929(s);  $^1\text{H}$  NMR (500 MHz,  $\text{CDCl}_3$ ):  $\delta$  7.72 (d,  $J = 7.5$  Hz, 1H), 7.56~7.52 (m, 3H), 7.37~7.34 (m, 4H), 7.28 (t,  $J = 7.5$  Hz, 1H), 5.94 (s, 1H), 2.25 (t,  $J = 7.0$  Hz, 2H), 1.52~1.46 (m, 2H), 1.42~1.35 (m, 2H), 0.86 (t,  $J = 7.0$  Hz, 3H);  $^{13}\text{C}$  NMR (125 MHz,  $\text{CDCl}_3$ ):  $\delta$  142.9, 132.2, 131.5 (2 $\times$ CH), 128.7, 128.4, 128.3 (2 $\times$ CH), 127.9, 126.5, 122.8, 121.2, 94.6, 87.3, 86.6, 79.4, 63.2, 30.5, 21.8, 18.4, 13.5; HRMS calcd for  $\text{C}_{21}\text{H}_{20}\text{O}$ : 288.1514, found: 288.1512.

**Spectra data for 1-(2-((4-methoxyphenyl)ethynyl)phenyl)-3-phenylprop-2-yn-1-ol (8).**

Yellow oil; IR (neat,  $\text{cm}^{-1}$ ): 3561(s), 2930(s);  $^1\text{H}$  NMR (500 MHz,  $\text{CDCl}_3$ ):  $\delta$  7.77 (d,  $J = 7.5$  Hz, 1H), 7.55 (d,  $J = 7.5$  Hz, 1H), 7.49 (d,  $J = 7.5$  Hz, 2H), 7.45 (d,  $J = 7.5$  Hz, 2H), 7.37 (t,  $J = 7.5$  Hz, 1H), 7.33~7.26 (m, 4H), 6.86 (d,  $J = 7.5$  Hz, 2H), 6.15 (s, 1H), 3.80 (s, 3H);  $^{13}\text{C}$  NMR (125 MHz,  $\text{CDCl}_3$ ):  $\delta$  159.8, 142.0, 133.0 (2 $\times$ CH),

132.2, 131.7 (2×CH), 128.5, 128.4, 128.2 (3×CH), 126.7, 122.5, 122.7, 114.8, 114.0 (2×CH), 95.1, 88.4, 86.3, 85.3, 63.7, 55.2; HRMS calcd for C<sub>24</sub>H<sub>18</sub>O<sub>2</sub>: 338.1307, found: 338.1306.

**Spectra data for 3-(4-fluorophenyl)-1-(2-((4-methoxyphenyl)ethynyl)phenyl)-prop-2-yn-1-ol (9).**

Yellow oil; IR (neat, cm<sup>-1</sup>): 3552(s), 2922(s); <sup>1</sup>H NMR (500 MHz, CDCl<sub>3</sub>): δ 7.73 (d, *J* = 8.0 Hz, 1H), 7.54 (d, *J* = 8.0 Hz, 1H), 7.47 (d, *J* = 9.0 Hz, 2H), 7.42~7.39 (m, 2H), 7.36 (t, *J* = 8.0 Hz, 1H), 7.31 (t, *J* = 8.0 Hz, 1H), 6.96 (t, *J* = 8.0 Hz, 2H), 6.86 (t, *J* = 9.0 Hz, 2H), 6.11 (s, 1H), 3.80 (s, 3H); <sup>13</sup>C NMR (125 MHz, CDCl<sub>3</sub>): δ 162.6 (d, *J*<sub>CF</sub> = 248.4 Hz), 159.9, 141.9, 133.7 (d, *J*<sub>CF</sub> = 7.8 Hz, 2×CH), 133.2 (2×CH), 132.3, 128.6, 128.3, 126.7, 121.7, 118.6, 115.5 (d, *J*<sub>CF</sub> = 22.1 Hz, 2×CH), 114.8, 114.1 (2×CH), 95.2, 88.1, 85.3 (2×C), 63.8, 55.3; HRMS calcd for C<sub>24</sub>H<sub>17</sub>FO<sub>2</sub>: 356.1213, found: 356.1211.

**Spectra data for 1-(2-((4-methoxyphenyl)ethynyl)phenyl)but-2-yn-1-ol (10).**

Yellow oil; IR (neat, cm<sup>-1</sup>): 3556(s), 2926(s); <sup>1</sup>H NMR (500 MHz, CDCl<sub>3</sub>): δ 7.69 (d, *J* = 8.0 Hz, 1H), 7.49 (d, *J* = 8.0 Hz, 1H), 7.47 (d, *J* = 8.5 Hz, 2H), 7.34 (t, *J* = 8.0 Hz, 1H), 7.27 (t, *J* = 8.0 Hz, 1H), 6.87 (d, *J* = 8.5 Hz, 2H), 5.90 (s, 1H), 3.80 (s, 3H), 1.88 (s, 3H); <sup>13</sup>C NMR (125 MHz, CDCl<sub>3</sub>): δ 160.0, 142.5, 133.0 (2×CH), 132.1, 128.5, 128.0, 126.6, 121.5, 114.9, 114.0 (2×CH), 94.8, 85.3, 82.9, 78.5, 63.3, 55.3, 3.8; HRMS calcd for C<sub>19</sub>H<sub>16</sub>O<sub>2</sub>: 276.1150, found: 276.1151.

**Spectra data for 3-phenyl-1-(2-(*p*-tolylethynyl)phenyl)prop-2-yn-1-ol (11).**

Yellow oil; IR (neat, cm<sup>-1</sup>): 3563(s), 2933(s); <sup>1</sup>H NMR (500 MHz, CDCl<sub>3</sub>): δ 7.78 (d, *J* = 7.5 Hz, 1H), 7.56 (d, *J* = 7.5 Hz, 1H), 7.47~7.45 (m, 4H), 7.38 (t, *J* = 7.5 Hz, 1H), 7.34~7.26 (m, 4H), 7.15 (d, *J* = 7.5 Hz, 2H), 6.16 (s, 1H), 2.36 (s, 3H); <sup>13</sup>C NMR (125 MHz, CDCl<sub>3</sub>): δ 142.1, 138.8, 132.4, 131.7 (2×CH), 131.4 (2×CH), 129.1 (2×CH), 128.7, 128.4, 128.2, 128.1 (2×CH), 126.7, 122.5, 121.6, 119.7, 95.3, 88.3, 86.4, 86.0, 63.8, 21.5; HRMS calcd for C<sub>24</sub>H<sub>18</sub>O: 322.1358, found: 322.1359.

**Spectra data for 3-*p*-tolyl-1-(2-(*p*-tolylethynyl)phenyl)prop-2-yn-1-ol (12).**

Yellow oil; IR (neat,  $\text{cm}^{-1}$ ): 3558(s), 2927(s);  $^1\text{H}$  NMR (500 MHz,  $\text{CDCl}_3$ ):  $\delta$  7.77 (d,  $J = 8.0$  Hz, 1H), 7.55 (d,  $J = 8.0$  Hz, 1H), 7.45 (d,  $J = 8.0$  Hz, 2H), 7.38 (t,  $J = 8.0$  Hz, 1H), 7.36~7.30 (m, 3H), 7.15 (d,  $J = 8.0$  Hz, 2H), 7.08 (d,  $J = 8.0$  Hz, 2H), 6.14 (s, 1H), 2.36 (s, 3H), 2.32 (s, 3H);  $^{13}\text{C}$  NMR (125 MHz,  $\text{CDCl}_3$ ):  $\delta$  142.2, 138.8, 138.6, 132.4, 131.6 (2 $\times$ CH), 131.5 (2 $\times$ CH), 129.2 (2 $\times$ CH), 129.0 (2 $\times$ CH), 128.7, 128.2, 126.8, 121.7, 119.7, 119.4, 95.2, 87.6, 86.7, 86.0, 63.8, 21.5, 21.4; HRMS calcd for  $\text{C}_{25}\text{H}_{20}\text{O}$ : 336.1514, found: 336.1514.

**Spectra data for 3-(4-fluorophenyl)-1-(2-(*p*-tolylethynyl)phenyl)prop-2-yn-1-ol (13).**

Yellow oil; IR (neat,  $\text{cm}^{-1}$ ): 3555(s), 2927(s);  $^1\text{H}$  NMR (500 MHz,  $\text{CDCl}_3$ ):  $\delta$  7.77 (d,  $J = 7.5$  Hz, 1H), 7.57 (d,  $J = 7.5$  Hz, 1H), 7.47 (d,  $J = 7.5$  Hz, 2H), 7.43~7.36 (m, 3H), 7.32 (t,  $J = 7.5$  Hz, 1H), 7.15 (d,  $J = 7.5$  Hz, 2H), 6.96 (t,  $J = 7.5$  Hz, 2H), 6.16 (s, 1H), 2.37 (s, 3H);  $^{13}\text{C}$  NMR (125 MHz,  $\text{CDCl}_3$ ):  $\delta$  162.4 (d,  $J_{\text{CF}} = 248.4$  Hz), 142.0, 138.8, 133.6 (d,  $J_{\text{CF}} = 8.9$  Hz, 2 $\times$ CH), 132.3, 131.4 (2 $\times$ CH), 129.1 (2 $\times$ CH), 128.6, 128.2, 126.5, 121.5, 119.6, 118.5, 115.4 (d,  $J_{\text{CF}} = 22.1$  Hz, 2 $\times$ CH), 95.3, 88.1, 86.0, 85.2, 63.5, 21.4; HRMS calcd for  $\text{C}_{24}\text{H}_{17}\text{FO}$ : 340.1263, found: 340.1260.

**Spectra data for 3-(4-methoxyphenyl)-1-(2-(*p*-tolylethynyl)phenyl)prop-2-yn-1-ol (14).**

Yellow oil; IR (neat,  $\text{cm}^{-1}$ ): 3551(s), 2920(s);  $^1\text{H}$  NMR (500 MHz,  $\text{CDCl}_3$ ):  $\delta$  7.77 (d,  $J = 8.0$  Hz, 1H), 7.55 (d,  $J = 8.0$  Hz, 1H), 7.44 (d,  $J = 8.0$  Hz, 2H), 7.39~7.36 (m, 3H), 7.31 (t,  $J = 8.0$  Hz, 1H), 7.15 (d,  $J = 8.0$  Hz, 2H), 6.80 (d,  $J = 8.0$  Hz, 2H), 6.13 (s, 1H), 3.77 (s, 3H), 2.36 (s, 3H);  $^{13}\text{C}$  NMR (125 MHz,  $\text{CDCl}_3$ ):  $\delta$  159.7, 142.3, 138.8, 133.2 (2 $\times$ CH), 132.4, 131.5 (2 $\times$ CH), 129.2 (2 $\times$ CH), 128.7, 128.2, 126.8, 121.6, 119.7, 114.6, 113.8 (2 $\times$ CH), 95.2, 86.9, 86.4, 86.0, 63.8, 55.2, 21.5; HRMS calcd for  $\text{C}_{25}\text{H}_{20}\text{O}_2$ : 352.1643, found: 352.1643.



**Spectra data for 1-(2-(*p*-tolylethynyl)phenyl)but-2-yn-1-ol (15).**

Yellow oil; IR (neat,  $\text{cm}^{-1}$ ): 3545(s), 2910(s);  $^1\text{H}$  NMR (500 MHz,  $\text{CDCl}_3$ ):  $\delta$  7.71 (d,  $J = 8.0$  Hz, 1H), 7.52 (d,  $J = 8.0$  Hz, 1H), 7.44 (d,  $J = 8.0$  Hz, 2H), 7.36 (t,  $J = 8.0$  Hz, 1H), 7.29 (t,  $J = 8.0$  Hz, 1H), 7.16 (d,  $J = 8.0$  Hz, 2H), 5.91 (s, 1H), 2.36 (s, 3H), 1.89 (s, 3H);  $^{13}\text{C}$  NMR (125 MHz,  $\text{CDCl}_3$ ):  $\delta$  142.6, 138.7, 132.2, 131.4 (2 $\times$ CH), 129.1 (2 $\times$ CH), 128.6, 128.0, 126.6, 121.4, 119.7, 95.0, 85.9, 83.0, 78.5, 63.3, 21.5, 3.7; HRMS calcd for  $\text{C}_{19}\text{H}_{16}\text{O}$ : 260.1201, found: 260.1200.

**Spectra data for 1-(2-(prop-1-ynyl)phenyl)but-2-yn-1-ol (16).**

Yellow oil; IR (neat,  $\text{cm}^{-1}$ ): 3541(s), 2912(s);  $^1\text{H}$  NMR (500 MHz,  $\text{CDCl}_3$ ):  $\delta$  7.64 (d,  $J = 7.5$  Hz, 1H), 7.36 (d,  $J = 7.5$  Hz, 1H), 7.27 (t,  $J = 7.5$  Hz, 1H), 7.20 (t,  $J = 7.5$  Hz, 1H), 5.80 (s, 1H), 2.05 (s, 3H), 1.86 (s, 3H);  $^{13}\text{C}$  NMR (125 MHz,  $\text{CDCl}_3$ ):  $\delta$  142.6, 132.2, 128.0, 127.9, 126.5, 122.0, 91.3, 82.7, 78.6, 77.0, 63.0, 4.4, 3.6; HRMS calcd for  $\text{C}_{13}\text{H}_{12}\text{O}$ : 184.0888, found: 184.0886.

**Spectra data for 1-(2-(prop-1-ynyl)phenyl)hept-2-yn-1-ol (17).**

Yellow oil; IR (neat,  $\text{cm}^{-1}$ ): 3540(s), 2900(s);  $^1\text{H}$  NMR (500 MHz,  $\text{CDCl}_3$ ):  $\delta$  7.65 (d,  $J = 7.5$  Hz, 1H), 7.37 (d,  $J = 7.5$  Hz, 1H), 7.29 (t,  $J = 7.5$  Hz, 1H), 7.21 (t,  $J = 7.5$  Hz, 1H), 5.82 (s, 1H), 2.25 (t,  $J = 7.5$  Hz, 2H), 2.07 (s, 3H), 1.53~1.46 (m, 2H), 1.44~1.38 (m, 2H), 0.89 (t,  $J = 7.5$  Hz, 3H);  $^{13}\text{C}$  NMR (125 MHz,  $\text{CDCl}_3$ ):  $\delta$  142.6, 132.4, 128.0, 127.9, 126.5, 122.1, 91.3, 87.3, 79.2, 77.1, 63.3, 30.6, 21.7, 18.5, 13.5, 4.44; HRMS calcd for  $\text{C}_{16}\text{H}_{18}\text{O}$ : 226.1358, found: 226.1358.

**Spectra data for phenyl(2-*p*-tolynaphthalen-1-yl)methanone (18).**

Yellow solid, m.p. 117.6~118.0  $^{\circ}\text{C}$ ; IR (neat,  $\text{cm}^{-1}$ ): 3081(s), 1665(s);  $^1\text{H}$  NMR (500 MHz,  $\text{CDCl}_3$ ):  $\delta$  7.99 (d,  $J = 8.5$  Hz, 1H), 7.92 (d,  $J = 8.5$  Hz, 1H), 7.69 (d,  $J = 8.5$  Hz, 1H), 7.63 (d,  $J = 8.5$  Hz, 2H), 7.55 (d,  $J = 8.5$  Hz, 1H), 7.49 (t,  $J = 8.5$  Hz, 1H), 7.43 (t,  $J = 8.5$  Hz, 1H), 7.39 (t,  $J = 8.5$  Hz, 1H), 7.24~7.22 (m, 4H), 7.02 (d,  $J = 8.0$  Hz, 2H), 2.24 (s, 3H);  $^{13}\text{C}$  NMR (125 MHz,  $\text{CDCl}_3$ ):  $\delta$  199.8, 137.9, 137.4, 137.3,

137.1, 135.5, 133.2, 132.3, 130.6, 129.6 (2×CH), 129.4, 129.3 (2×CH), 128.9 (2×CH), 128.3 (2×CH), 128.1, 127.7, 127.1, 126.1, 125.5, 21.0; HRMS calcd for C<sub>24</sub>H<sub>18</sub>O: 322.1358, found: 322.1357.

**Spectra data for (2-(4-fluorophenyl)naphthalen-1-yl)(phenyl)methanone (19).**

Yellow solid, m.p. 113.9~114.5 °C; IR (neat, cm<sup>-1</sup>): 3079(s), 1662(s); <sup>1</sup>H NMR (500 MHz, CDCl<sub>3</sub>): δ 8.00 (d, *J* = 8.0 Hz, 1H), 7.94 (d, *J* = 8.0 Hz, 1H), 7.72 (d, *J* = 8.0 Hz, 1H), 7.61 (d, *J* = 8.0 Hz, 2H), 7.53~7.50 (m, 2H), 7.45 (t, *J* = 8.0 Hz, 1H), 7.40 (t, *J* = 8.0 Hz, 1H), 7.33~7.30 (m, 2H), 7.24 (t, *J* = 8.0 Hz, 2H), 6.91 (t, *J* = 8.0 Hz, 2H); <sup>13</sup>C NMR (125 MHz, CDCl<sub>3</sub>): δ 199.6, 162.2 (d, *J*<sub>CF</sub> = 246.1 Hz), 137.7, 136.2, 136.2, 135.8, 133.4, 132.4, 131.1 (d, *J*<sub>CF</sub> = 7.8 Hz, 2×CH), 130.6, 129.5 (3×CH), 128.4 (2×CH), 128.1, 127.4, 127.3, 126.4, 125.5, 115.1 (d, *J*<sub>CF</sub> = 22.2 Hz, 2×CH); HRMS calcd for C<sub>23</sub>H<sub>15</sub>FO: 326.1107, found: 326.1106.

NOE-map of compound **19**

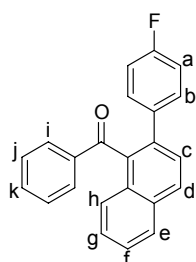

| irradiation             | enhancement (%)                                                  |
|-------------------------|------------------------------------------------------------------|
| H <sup>a</sup> (δ 6.91) | H <sup>b</sup> (δ 7.31, 0.14 %)                                  |
| H <sup>b</sup> (δ 7.31) | H <sup>c</sup> (δ 7.52, 0.93 %); H <sup>a</sup> (δ 6.91, 1.56 %) |
| H <sup>d</sup> (δ 7.94) | H <sup>c</sup> (δ 8.00, 1.49 %); H <sup>e</sup> (δ 7.51, 1.39 %) |
| H <sup>e</sup> (δ 8.00) | H <sup>d</sup> (δ 7.94, 0.75 %); H <sup>f</sup> (δ 7.45, 1.87 %) |
| H <sup>h</sup> (δ 7.72) | H <sup>g</sup> (δ 7.40, 1.08 %)                                  |

**Spectra data for (2-(4-methoxyphenyl)naphthalen-1-yl)(phenyl)methanone (20).**

Yellow solid, m.p. 123.0~123.5 °C; IR (neat, cm<sup>-1</sup>): 3081(s), 1663(s); <sup>1</sup>H NMR (500 MHz, CDCl<sub>3</sub>): δ 7.98 (d, *J* = 8.0 Hz, 1H), 7.91 (d, *J* = 8.0 Hz, 1H), 7.69 (d, *J* = 8.0 Hz, 1H), 7.61 (d, *J* = 8.0 Hz, 2H), 7.53 (d, *J* = 8.0 Hz, 1H), 7.48 (t, *J* = 8.0 Hz, 1H), 7.42 (t, *J* = 8.0 Hz, 1H), 7.38 (t, *J* = 8.0 Hz, 1H), 7.27 (d, *J* = 9.0 Hz, 2H), 7.23 (t, *J* = 8.0 Hz, 2H), 6.74 (d, *J* = 9.0 Hz, 2H), 3.71 (s, 3H); <sup>13</sup>C NMR (125 MHz, CDCl<sub>3</sub>): δ 199.9, 158.9, 137.9, 137.0, 135.4, 133.2, 132.6, 132.2, 130.6, 130.6 (2×CH), 129.5 (2×CH), 129.4, 128.3 (2×CH), 128.1, 127.7, 127.1, 126.1, 125.4, 113.7 (2×CH), 55.1; HRMS calcd for C<sub>24</sub>H<sub>18</sub>O<sub>2</sub>: 338.1307, found: 338.1306.

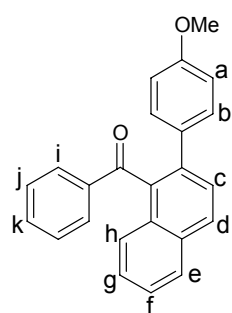

|                                 | enhancement (%)                                                                                                    |
|---------------------------------|--------------------------------------------------------------------------------------------------------------------|
| Me ( $\delta$ 3.71)             | H <sup>a</sup> ( $\delta$ 6.74, 1.54 %)                                                                            |
| H <sup>a</sup> ( $\delta$ 6.74) | H <sup>b</sup> ( $\delta$ 7.27, 1.59 %); Me ( $\delta$ 3.71, 2.24 %)                                               |
| H <sup>b</sup> ( $\delta$ 7.27) | H <sup>i</sup> (7.61, 0.54 %); H <sup>c</sup> ( $\delta$ 7.53, 0.82 %);<br>H <sup>a</sup> ( $\delta$ 6.74, 2.73 %) |
| H <sup>i</sup> ( $\delta$ 7.61) | H <sup>b</sup> ( $\delta$ 7.27, 0.54 %); H <sup>j</sup> ( $\delta$ 7.23, 1.71 %)                                   |
| H <sup>d</sup> ( $\delta$ 7.91) | H <sup>c</sup> ( $\delta$ 7.98, 1.21 %); H <sup>c</sup> ( $\delta$ 7.53, 1.52 %)                                   |
| H <sup>e</sup> ( $\delta$ 7.98) | H <sup>d</sup> ( $\delta$ 7.91, 1.28 %); H <sup>f</sup> ( $\delta$ 7.48, 2.59 %)                                   |

**Spectra data for (2-methylnaphthalen-1-yl)(phenyl)methanone (21).**

Yellow oil; IR (neat,  $\text{cm}^{-1}$ ): 3075(s), 1654(s);  $^1\text{H}$  NMR (500 MHz,  $\text{CDCl}_3$ ):  $\delta$  7.86~7.82 (m, 4H), 7.57 (t,  $J = 8.5$  Hz, 1H), 7.48 (d,  $J = 8.5$  Hz, 1H), 7.42 (t,  $J = 8.5$  Hz, 3H), 7.38~7.33 (m, 2H), 2.31 (s, 3H);  $^{13}\text{C}$  NMR (125 MHz,  $\text{CDCl}_3$ ):  $\delta$  200.3, 137.5, 135.9, 133.8, 132.2, 131.6, 130.6, 129.7 (2 $\times$ CH), 128.9, 128.8 (2 $\times$ CH), 128.5, 128.0, 126.7, 125.4, 124.9, 19.7; HRMS calcd for  $\text{C}_{18}\text{H}_{14}\text{O}$ : 246.1045, found: 246.1044.

**Spectra data for (2-butylnaphthalen-1-yl)(phenyl)methanone (22).**

Yellow oil; IR (neat,  $\text{cm}^{-1}$ ): 3088(s), 1666(s);  $^1\text{H}$  NMR (500 MHz,  $\text{CDCl}_3$ ):  $\delta$  7.87~7.80 (m, 4H), 7.56 (t,  $J = 8.0$  Hz, 1H), 7.46 (d,  $J = 8.0$  Hz, 1H), 7.42~7.39 (m, 4H), 7.33 (t,  $J = 8.0$  Hz, 1H), 2.55 (t,  $J = 7.5$  Hz, 2H), 1.56~1.52 (m, 2H), 1.27~1.20 (m, 2H), 0.79 (t,  $J = 7.5$  Hz, 3H);  $^{13}\text{C}$  NMR (125 MHz,  $\text{CDCl}_3$ ):  $\delta$  200.3, 137.9, 137.3, 135.6, 133.7, 131.7, 130.6, 129.8 (2 $\times$ CH), 129.0, 128.7 (2 $\times$ CH), 128.0, 127.4, 126.6, 125.4, 125.1, 33.4, 33.3, 22.5, 13.8; HRMS calcd for  $\text{C}_{21}\text{H}_{20}\text{O}$ : 288.1514, found: 288.1513.

**Spectra data for (4-methoxyphenyl)(2-phenylnaphthalen-1-yl)methanone (23A).**

Yellow solid, m.p. 122.2~122.8  $^{\circ}\text{C}$ ; IR (neat,  $\text{cm}^{-1}$ ): 3084(s), 1664(s);  $^1\text{H}$  NMR (500 MHz,  $\text{CDCl}_3$ ):  $\delta$  7.99 (d,  $J = 8.5$  Hz, 1H), 7.92 (d,  $J = 8.5$  Hz, 1H), 7.73 (d,  $J = 8.5$  Hz, 1H), 7.63 (d,  $J = 8.5$  Hz, 2H), 7.57 (d,  $J = 8.5$  Hz, 1H), 7.50 (t,  $J = 8.5$  Hz, 1H), 7.44 (d,  $J = 8.5$  Hz, 1H), 7.40 (d,  $J = 8.5$  Hz, 2H), 7.24 (t,  $J = 8.5$  Hz, 2H), 7.18 (t,  $J =$

8.5 Hz, 1H), 6.70 (d,  $J = 8.5$  Hz, 2H), 3.71 (s, 3H);  $^{13}\text{C}$  NMR (125 MHz,  $\text{CDCl}_3$ ):  $\delta$  198.0, 163.5, 140.2, 136.9, 135.8, 132.3, 131.9 (2 $\times$ CH), 131.0, 130.6, 129.3 (2 $\times$ CH), 129.1, 128.1 (2 $\times$ CH), 128.0, 127.6, 127.3, 127.0, 126.2, 125.5, 113.5 (2 $\times$ CH), 55.2; HRMS calcd for  $\text{C}_{24}\text{H}_{18}\text{O}_2$ : 338.1307, found: 338.1306.

**Spectra data for 2-phenylnaphthalene (23B).**

Yellow solid, m.p. 101.0~101.5  $^\circ\text{C}$ ; IR (neat,  $\text{cm}^{-1}$ ): 3071(s);  $^1\text{H}$  NMR (500 MHz,  $\text{CDCl}_3$ ):  $\delta$  8.09 (s, 1H), 7.94 (t,  $J = 8.0$  Hz, 2H), 7.89 (d,  $J = 8.0$  Hz, 1H), 7.80~7.76 (m, 3H), 7.56~7.51 (m, 4H), 7.42 (t,  $J = 8.0$  Hz, 1H);  $^{13}\text{C}$  NMR (125 MHz,  $\text{CDCl}_3$ ):  $\delta$  141.1, 138.5, 133.6, 132.6, 128.8 (2 $\times$ CH), 128.4, 128.2, 127.6, 127.4 (2 $\times$ CH), 127.3, 126.3, 125.9, 125.8, 125.6; HRMS calcd for  $\text{C}_{16}\text{H}_{12}$ : 204.0939, found: 204.0938.

**Spectra data for (2-(4-fluorophenyl)naphthalen-1-yl)(4-methoxyphenyl)-methanone (24A).**

Yellow solid, m.p. 117.1~117.8  $^\circ\text{C}$ ; IR (neat,  $\text{cm}^{-1}$ ): 3081(s), 1661(s);  $^1\text{H}$  NMR (500 MHz,  $\text{CDCl}_3$ ):  $\delta$  7.97 (d,  $J = 9.0$  Hz, 1H), 7.91 (d,  $J = 9.0$  Hz, 1H), 7.70 (d,  $J = 9.0$  Hz, 1H), 7.60 (d,  $J = 9.0$  Hz, 2H), 7.51~7.48 (m, 2H), 7.43 (t,  $J = 8.0$  Hz, 1H), 7.35~7.32 (m, 2H), 6.92 (t,  $J = 9.0$  Hz, 2H), 6.71 (d,  $J = 9.0$  Hz, 2H), 3.74 (s, 3H);  $^{13}\text{C}$  NMR (125 MHz,  $\text{CDCl}_3$ ):  $\delta$  197.9, 163.7, 162.1 (d,  $J_{\text{CF}} = 246.3$  Hz), 136.3, 136.0, 135.9, 132.3, 132.0 (2 $\times$ CH), 131.0 (d,  $J_{\text{CF}} = 7.8$  Hz, 2 $\times$ CH), 130.9, 130.6, 129.2, 128.1, 127.4, 127.1, 126.3, 125.6, 115.1 (d,  $J_{\text{CF}} = 22.1$  Hz, 2 $\times$ CH), 113.6 (2 $\times$ CH), 55.3; HRMS calcd for  $\text{C}_{24}\text{H}_{17}\text{FO}_2$ : 356.1213, found: 356.1211.

**Spectra data for 2-(4-fluorophenyl)naphthalene (24B).**

Yellow solid, m.p. 99.1~99.5  $^\circ\text{C}$ ; IR (neat,  $\text{cm}^{-1}$ ): 3071(s);  $^1\text{H}$  NMR (500 MHz,  $\text{CDCl}_3$ ):  $\delta$  7.98 (s, 1H), 7.91~7.85 (m, 3H), 7.69~7.65 (m, 3H), 7.50~7.46 (m, 2H), 7.16 (t,  $J = 8.0$  Hz, 2H);  $^{13}\text{C}$  NMR (125 MHz,  $\text{CDCl}_3$ ):  $\delta$  162.4 (d,  $J_{\text{CF}} = 246.1$  Hz), 137.5, 137.2, 133.6, 132.5, 128.9 (d,  $J_{\text{CF}} = 7.8$  Hz, 2 $\times$ CH), 128.5, 128.1, 127.6, 126.4,

126.0, 125.6, 125.4, 115.7 (d,  $J_{CF} = 21.0$  Hz,  $2 \times CH$ ); HRMS calcd for  $C_{16}H_{11}F$ :  
222.0845, found: 222.0844.

**Spectra data for (4-methoxyphenyl)(2-methylnaphthalen-1-yl)methanone (25).**

Yellow oil; IR (neat,  $cm^{-1}$ ): 3079(s), 1655(s);  $^1H$  NMR (500 MHz,  $CDCl_3$ ):  $\delta$   
7.84~7.78 (m, 4H), 7.51 (d,  $J = 7.5$  Hz, 1H), 7.40 (t,  $J = 7.5$  Hz, 1H), 7.36~7.32 (m,  
2H), 6.87 (d,  $J = 7.5$  Hz, 2H), 3.80 (s, 3H), 2.31 (s, 3H);  $^{13}C$  NMR (125 MHz,  $CDCl_3$ ):  
 $\delta$  198.6, 164.0, 136.2, 132.0 ( $2 \times CH$ ), 131.9, 131.5, 130.6, 130.5, 128.6, 128.4, 127.9,  
126.5, 125.2, 124.9, 119.4 ( $2 \times CH$ ), 55.4, 19.6; HRMS calcd for  $C_{19}H_{16}O_2$ : 276.1150,  
found: 276.1151.

**Spectra data for (2-phenylnaphthalen-1-yl)(*p*-tolyl)methanone (26).**

Yellow solid, m.p. 122.0~122.6 °C; IR (neat,  $cm^{-1}$ ): 3085(s), 1660(s);  $^1H$  NMR (500  
MHz,  $CDCl_3$ ):  $\delta$  8.00 (d,  $J = 8.5$  Hz, 1H), 7.93 (d,  $J = 8.5$  Hz, 1H), 7.73 (d,  $J = 8.5$   
Hz, 1H), 7.59~7.56 (m, 3H), 7.50 (t,  $J = 8.5$  Hz, 1H), 7.43 (t,  $J = 8.5$  Hz, 1H), 7.39 (d,  
 $J = 8.5$  Hz, 2H), 7.24 (t,  $J = 8.5$  Hz, 2H), 7.18 (t,  $J = 8.5$  Hz, 1H), 7.03 (d,  $J = 8.5$  Hz,  
2H), 2.27 (s, 3H);  $^{13}C$  NMR (125 MHz,  $CDCl_3$ ):  $\delta$  199.2, 144.1, 140.2, 137.1, 135.8,  
135.4, 132.3, 130.6, 129.7 ( $2 \times CH$ ), 129.4 ( $2 \times CH$ ), 129.2, 129.0 ( $2 \times CH$ ), 128.1  
( $2 \times CH$ ), 128.0, 127.6, 127.3, 127.0, 126.2, 125.5, 21.6; HRMS calcd for  $C_{24}H_{18}O$ :  
322.1358, found: 322.1358.

**Spectra data for *p*-tolyl(2-*p*-tolyl)naphthalen-1-yl)methanone (27).**

Yellow solid, m.p. 123.1~123.8 °C; IR (neat,  $cm^{-1}$ ): 3083(s), 1662(s);  $^1H$  NMR (500  
MHz,  $CDCl_3$ ):  $\delta$  7.98 (d,  $J = 8.0$  Hz, 1H), 7.91 (d,  $J = 8.0$  Hz, 1H), 7.68 (d,  $J = 8.0$   
Hz, 1H), 7.58~7.55 (m, 3H), 7.48 (t,  $J = 8.0$  Hz, 1H), 7.41 (t,  $J = 8.0$  Hz, 1H), 7.28(d,  
 $J = 8.0$  Hz, 2H), 7.04 (d,  $J = 8.0$  Hz, 4H), 2.29 (s, 3H), 2.25 (s, 3H);  $^{13}C$  NMR (125  
MHz,  $CDCl_3$ ):  $\delta$  199.3, 144.1, 137.3, 137.1, 137.0, 135.7, 135.5, 132.2, 130.6, 129.8  
( $2 \times CH$ ), 129.2 ( $2 \times CH$ ), 129.1, 129.0 ( $2 \times CH$ ), 128.9 ( $2 \times CH$ ), 128.0, 127.8, 127.0,  
126.1, 125.5, 21.6, 21.0; HRMS calcd for  $C_{25}H_{20}O$ : 336.1514, found: 336.1513.

**Spectra data for (2-(4-fluorophenyl)naphthalen-1-yl)(p-tolyl)methanone (28).**

Yellow solid, m.p. 116.0~116.6 °C; IR (neat, cm<sup>-1</sup>): 3082(s), 1662(s); <sup>1</sup>H NMR (500 MHz, CDCl<sub>3</sub>): δ 7.98 (d, *J* = 8.5 Hz, 1H), 7.92 (d, *J* = 8.5 Hz, 1H), 7.70 (d, *J* = 8.5 Hz, 1H), 7.54~7.48 (m, 4H), 7.43 (t, *J* = 8.5 Hz, 1H), 7.35~7.32 (m, 2H), 7.04 (d, *J* = 8.5 Hz, 2H), 6.92 (t, *J* = 8.5 Hz, 2H), 2.28 (s, 3H); <sup>13</sup>C NMR (125 MHz, CDCl<sub>3</sub>): δ 199.1, 162.1 (d, *J*<sub>CF</sub> = 246.1 Hz), 144.4, 136.2, 136.0, 135.3, 132.3, 131.0 (d, *J*<sub>CF</sub> = 7.8 Hz, 2×CH), 130.6 (2×C), 129.7 (2×CH), 129.3, 129.1 (2×CH), 128.1, 127.4, 127.2, 126.3, 125.5, 115.1 (d, *J*<sub>CF</sub> = 21.0 Hz, 2×CH), 21.6; HRMS calcd for C<sub>24</sub>H<sub>17</sub>FO: 340.1263, found: 340.1263.

**Spectra data for (2-(4-methoxyphenyl)naphthalen-1-yl)(p-tolyl)methanone (29).**

Yellow solid, m.p. 124.5~124.6 °C; IR (neat, cm<sup>-1</sup>): 3089(s), 1669(s); <sup>1</sup>H NMR (500 MHz, CDCl<sub>3</sub>): δ 7.97 (d, *J* = 8.0 Hz, 1H), 7.90 (d, *J* = 8.0 Hz, 1H), 7.68 (d, *J* = 8.0 Hz, 1H), 7.56~7.53 (m, 3H), 7.47 (t, *J* = 8.0 Hz, 1H), 7.41 (t, *J* = 8.0 Hz, 1H), 7.31 (d, *J* = 8.0 Hz, 2H), 7.03 (d, *J* = 8.0 Hz, 2H), 6.77 (d, *J* = 8.0 Hz, 2H), 3.71 (s, 3H), 2.28 (s, 3H); <sup>13</sup>C NMR (125 MHz, CDCl<sub>3</sub>): δ 199.4, 158.8, 144.1, 136.7, 135.6, 135.4, 132.6, 132.1, 130.6, 130.5 (2×CH), 129.7 (2×CH), 129.2, 129.1 (2×CH), 128.0, 127.7, 127.0, 126.0, 125.4, 113.6 (2×CH), 55.1, 21.6; HRMS calcd for C<sub>25</sub>H<sub>20</sub>O<sub>2</sub>: 352.1463, found: 352.1463.

**Spectra data for (2-methylnaphthalen-1-yl)(p-tolyl)methanone (30).**

Yellow oil; IR (neat, cm<sup>-1</sup>): 3089(s), 1667(s); <sup>1</sup>H NMR (500 MHz, CDCl<sub>3</sub>): δ 7.84 (d, *J* = 8.5 Hz, 2H), 7.73 (d, *J* = 8.5 Hz, 2H), 7.50 (d, *J* = 8.5 Hz, 1H), 7.41 (t, *J* = 8.5 Hz, 1H), 7.37~7.33 (m, 2H), 7.21 (d, *J* = 8.5 Hz, 2H), 2.39 (s, 3H), 2.34 (s, 3H); <sup>13</sup>C NMR (125 MHz, CDCl<sub>3</sub>): δ 199.8, 144.8, 136.1, 135.1, 132.0, 131.6, 130.6, 129.8 (2×CH), 129.8 (2×CH), 128.7, 128.4, 128.0, 126.6, 125.3, 124.9, 21.7, 19.7; HRMS calcd for C<sub>19</sub>H<sub>16</sub>O: 260.1201, found: 260.1200.

**Spectra data for 1-(2-methylnaphthalen-1-yl)ethanone (31A).**

Yellow oil; IR (neat,  $\text{cm}^{-1}$ ): 3091(s), 1670(s);  $^1\text{H}$  NMR (500 MHz,  $\text{CDCl}_3$ ):  $\delta$  7.81 (d,  $J = 8.0$  Hz, 1H), 7.75 (d,  $J = 8.0$  Hz, 1H), 7.59 (d,  $J = 8.0$  Hz, 1H), 7.47 (t,  $J = 8.0$  Hz, 1H), 7.43 (t,  $J = 8.0$  Hz, 1H), 7.28 (d,  $J = 8.0$  Hz, 1H), 2.62 (s, 3H), 2.42 (s, 3H);  $^{13}\text{C}$  NMR (125 MHz,  $\text{CDCl}_3$ ):  $\delta$  208.3, 138.7, 131.7, 129.9, 128.8, 128.7, 128.6, 128.2, 126.9, 125.4, 123.9, 32.9, 19.3; HRMS calcd for  $\text{C}_{13}\text{H}_{12}\text{O}$ : 184.0888, found: 184.0887.

**Spectra data for 2-methylnaphthalene (31B).**

Brown solid, m.p. 34~36  $^{\circ}\text{C}$ ; IR (neat,  $\text{cm}^{-1}$ ): 3051(s), 292(w);  $^1\text{H}$  NMR (500 MHz,  $\text{CDCl}_3$ ):  $\delta$  7.78 (d,  $J = 8.5$  Hz, 1H), 7.52~7.73 (m, 2H), 7.61 (s, 1H), 7.45~7.38 (m, 2H), 7.30 (d,  $J = 8.5$  Hz, 1H), 2.51 (s, 3H);  $^{13}\text{C}$  NMR (125 MHz,  $\text{CDCl}_3$ ):  $\delta$  135.3, 133.6, 131.7, 128.0, 127.6, 127.5, 127.2, 126.8, 125.8, 124.9, 21.6; HRMS calcd for  $\text{C}_{11}\text{H}_{10}$ : 142.0783, found: 142.0782.

**Spectra data for 1-(2-butylnaphthalen-1-yl)ethanone (32).**

Yellow oil; IR (neat,  $\text{cm}^{-1}$ ): 3086(s), 1662(s);  $^1\text{H}$  NMR (500 MHz,  $\text{CDCl}_3$ ):  $\delta$  7.81 (d,  $J = 8.5$  Hz, 1H), 7.77 (d,  $J = 8.5$  Hz, 1H), 7.57 (d,  $J = 8.5$  Hz, 1H), 7.47 (t,  $J = 8.5$  Hz, 1H), 7.43 (t,  $J = 8.5$  Hz, 1H), 7.33 (d,  $J = 8.5$  Hz, 1H), 2.66 (t,  $J = 7.5$  Hz, 2H), 2.62 (s, 3H), 1.66~1.60 (m, 2H), 1.41~1.34 (m, 2H), 0.92 (t,  $J = 7.5$  Hz, 3H);  $^{13}\text{C}$  NMR (125 MHz,  $\text{CDCl}_3$ ):  $\delta$  208.3, 138.4, 135.0, 131.8, 128.9, 128.8, 128.3, 127.5, 126.8, 125.5, 124.0, 33.8, 33.5, 33.3, 22.7, 13.9; HRMS calcd for  $\text{C}_{16}\text{H}_{18}\text{O}$ : 226.1358, found: 226.1357.

**(V) x-Ray data of compound 2.**

**(1) ORTEP-Drawing of compound 2.** (The ellipsoids of atoms are drawn to  
compass 50% probability.)

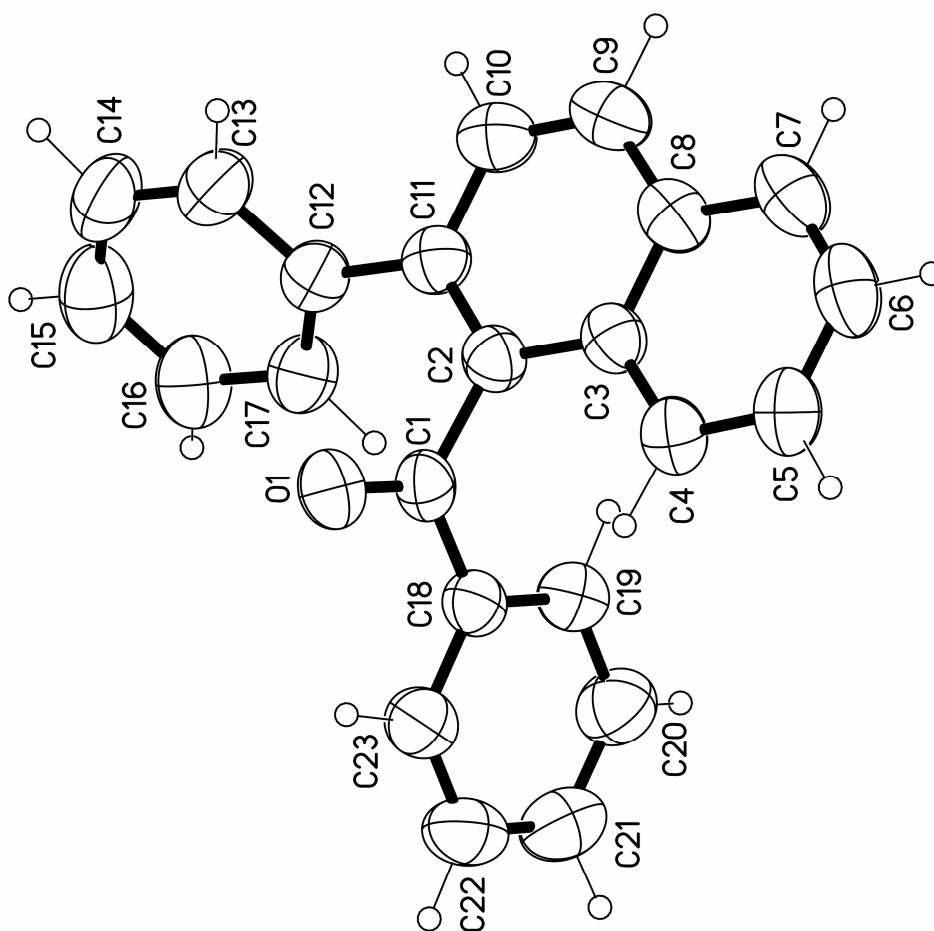



Table 1. Crystal data and structure refinement for compound 2.

|                                   |                                             |                              |
|-----------------------------------|---------------------------------------------|------------------------------|
| Identification code               | 06mr53m                                     |                              |
| Empirical formula                 | C23 H16 O                                   |                              |
| Formula weight                    | 308.36                                      |                              |
| Temperature                       | 294(2) K                                    |                              |
| Wavelength                        | 0.71073 Å                                   |                              |
| Crystal system                    | Triclinic                                   |                              |
| Space group                       | <i>P</i> -1                                 |                              |
| Unit cell dimensions              | a = 9.3540(17) Å                            | $\alpha = 92.763(3)^\circ$ . |
|                                   | b = 9.4771(18) Å                            | $\beta = 116.301(3)^\circ$ . |
|                                   | c = 10.2788(19) Å                           | $\gamma = 91.150(3)^\circ$ . |
| Volume                            | 815.1(3) Å <sup>3</sup>                     |                              |
| Z                                 | 2                                           |                              |
| Density (calculated)              | 1.256 Mg/m <sup>3</sup>                     |                              |
| Absorption coefficient            | 0.075 mm <sup>-1</sup>                      |                              |
| F(000)                            | 324                                         |                              |
| Crystal size                      | 0.98 x 0.8 x 0.09 mm <sup>3</sup>           |                              |
| Theta range for data collection   | 2.15 to 28.34°                              |                              |
| Index ranges                      | -12 ≤ h ≤ 12, -12 ≤ k ≤ 12, -13 ≤ l ≤ 13    |                              |
| Reflections collected             | 9686                                        |                              |
| Independent reflections           | 4060 [R(int) = 0.0395]                      |                              |
| Completeness to theta = 28.34°    | 99.4 %                                      |                              |
| Absorption correction             | Empirical                                   |                              |
| Max. and min. transmission        | 0.94704 and 0.83150                         |                              |
| Refinement method                 | Full-matrix least-squares on F <sup>2</sup> |                              |
| Data / restraints / parameters    | 4060 / 0 / 217                              |                              |
| Goodness-of-fit on F <sup>2</sup> | 0.914                                       |                              |
| Final R indices [I > 2σ(I)]       | R1 = 0.0490, wR2 = 0.1121                   |                              |
| R indices (all data)              | R1 = 0.0930, wR2 = 0.1294                   |                              |
| Largest diff. peak and hole       | 0.149 and -0.134 e. Å <sup>-3</sup>         |                              |

Table 2. Bond lengths [ $\text{\AA}$ ] and angles [ $^\circ$ ] for compound 2.

---

|              |            |
|--------------|------------|
| O(1)-C(1)    | 1.2187(16) |
| C(1)-C(18)   | 1.482(2)   |
| C(1)-C(2)    | 1.509(2)   |
| C(2)-C(11)   | 1.3803(19) |
| C(2)-C(3)    | 1.4281(19) |
| C(3)-C(4)    | 1.4174(19) |
| C(3)-C(8)    | 1.418(2)   |
| C(4)-C(5)    | 1.371(2)   |
| C(4)-H(4A)   | 1.0753     |
| C(5)-C(6)    | 1.406(2)   |
| C(5)-H(5A)   | 1.0456     |
| C(6)-C(7)    | 1.356(2)   |
| C(6)-H(6A)   | 1.0062     |
| C(7)-C(8)    | 1.410(2)   |
| C(7)-H(7A)   | 0.9910     |
| C(8)-C(9)    | 1.421(2)   |
| C(9)-C(10)   | 1.350(2)   |
| C(9)-H(9A)   | 1.0461     |
| C(10)-C(11)  | 1.418(2)   |
| C(10)-H(10A) | 1.0138     |
| C(11)-C(12)  | 1.488(2)   |
| C(12)-C(17)  | 1.388(2)   |
| C(12)-C(13)  | 1.397(2)   |
| C(13)-C(14)  | 1.387(2)   |
| C(13)-H(13A) | 1.0990     |
| C(14)-C(15)  | 1.371(3)   |
| C(14)-H(14A) | 0.9963     |
| C(15)-C(16)  | 1.371(2)   |
| C(15)-H(15A) | 1.0501     |
| C(16)-C(17)  | 1.380(2)   |
| C(16)-H(16A) | 1.0329     |
| C(17)-H(17A) | 1.0316     |
| C(18)-C(19)  | 1.387(2)   |
| C(18)-C(23)  | 1.393(2)   |
| C(19)-C(20)  | 1.374(2)   |
| C(19)-H(19A) | 0.9785     |

|                    |            |
|--------------------|------------|
| C(20)-C(21)        | 1.370(2)   |
| C(20)-H(20A)       | 1.0145     |
| C(21)-C(22)        | 1.376(2)   |
| C(21)-H(21A)       | 1.0336     |
| C(22)-C(23)        | 1.375(2)   |
| C(22)-H(22A)       | 0.9878     |
| C(23)-H(23A)       | 1.0548     |
| O(1)-C(1)-C(18)    | 121.40(14) |
| O(1)-C(1)-C(2)     | 118.74(14) |
| C(18)-C(1)-C(2)    | 119.84(13) |
| C(11)-C(2)-C(3)    | 120.74(14) |
| C(11)-C(2)-C(1)    | 120.47(13) |
| C(3)-C(2)-C(1)     | 118.46(13) |
| C(4)-C(3)-C(8)     | 118.08(13) |
| C(4)-C(3)-C(2)     | 122.51(14) |
| C(8)-C(3)-C(2)     | 119.40(13) |
| C(5)-C(4)-C(3)     | 120.85(15) |
| C(5)-C(4)-H(4A)    | 120.7      |
| C(3)-C(4)-H(4A)    | 118.3      |
| C(4)-C(5)-C(6)     | 120.38(15) |
| C(4)-C(5)-H(5A)    | 117.9      |
| C(6)-C(5)-H(5A)    | 121.6      |
| C(7)-C(6)-C(5)     | 120.10(14) |
| C(7)-C(6)-H(6A)    | 119.6      |
| C(5)-C(6)-H(6A)    | 120.3      |
| C(6)-C(7)-C(8)     | 121.09(16) |
| C(6)-C(7)-H(7A)    | 120.7      |
| C(8)-C(7)-H(7A)    | 118.2      |
| C(7)-C(8)-C(3)     | 119.47(15) |
| C(7)-C(8)-C(9)     | 122.16(15) |
| C(3)-C(8)-C(9)     | 118.35(14) |
| C(10)-C(9)-C(8)    | 120.91(15) |
| C(10)-C(9)-H(9A)   | 121.6      |
| C(8)-C(9)-H(9A)    | 117.5      |
| C(9)-C(10)-C(11)   | 121.95(14) |
| C(9)-C(10)-H(10A)  | 117.7      |
| C(11)-C(10)-H(10A) | 120.3      |

|                    |            |
|--------------------|------------|
| C(2)-C(11)-C(10)   | 118.61(14) |
| C(2)-C(11)-C(12)   | 123.48(14) |
| C(10)-C(11)-C(12)  | 117.88(13) |
| C(17)-C(12)-C(13)  | 118.91(14) |
| C(17)-C(12)-C(11)  | 121.17(13) |
| C(13)-C(12)-C(11)  | 119.78(15) |
| C(14)-C(13)-C(12)  | 119.44(17) |
| C(14)-C(13)-H(13A) | 118.2      |
| C(12)-C(13)-H(13A) | 122.3      |
| C(15)-C(14)-C(13)  | 120.91(16) |
| C(15)-C(14)-H(14A) | 121.7      |
| C(13)-C(14)-H(14A) | 117.3      |
| C(14)-C(15)-C(16)  | 119.84(16) |
| C(14)-C(15)-H(15A) | 123.7      |
| C(16)-C(15)-H(15A) | 116.3      |
| C(15)-C(16)-C(17)  | 120.28(17) |
| C(15)-C(16)-H(16A) | 120.2      |
| C(17)-C(16)-H(16A) | 119.0      |
| C(16)-C(17)-C(12)  | 120.61(15) |
| C(16)-C(17)-H(17A) | 120.9      |
| C(12)-C(17)-H(17A) | 118.4      |
| C(19)-C(18)-C(23)  | 119.02(15) |
| C(19)-C(18)-C(1)   | 121.26(14) |
| C(23)-C(18)-C(1)   | 119.72(14) |
| C(20)-C(19)-C(18)  | 120.35(16) |
| C(20)-C(19)-H(19A) | 122.5      |
| C(18)-C(19)-H(19A) | 117.1      |
| C(21)-C(20)-C(19)  | 120.40(16) |
| C(21)-C(20)-H(20A) | 118.0      |
| C(19)-C(20)-H(20A) | 121.2      |
| C(20)-C(21)-C(22)  | 119.79(17) |
| C(20)-C(21)-H(21A) | 119.8      |
| C(22)-C(21)-H(21A) | 120.3      |
| C(23)-C(22)-C(21)  | 120.63(16) |
| C(23)-C(22)-H(22A) | 123.1      |
| C(21)-C(22)-H(22A) | 116.3      |
| C(22)-C(23)-C(18)  | 119.81(16) |
| C(22)-C(23)-H(23A) | 128.6      |

C(18)-C(23)-H(23A)

111.6

---

Symmetry transformations used to generate equivalent atoms:
